# Supplementary material
Source: PubMed Central journal article supplement (PMC11028176)
Supplement: 262_2019_2429_MOESM1_ESM.pdf [file 262_2019_2429_MOESM1_ESM.pdf]

Supplementary Figure 1

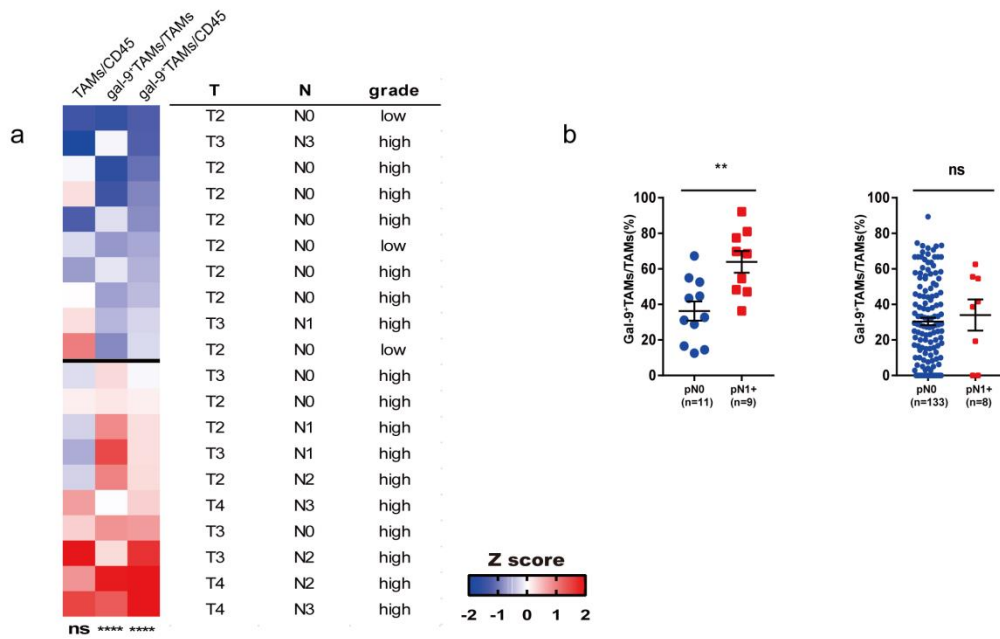

**Supplementary Figure 1. Clinical characteristics of the patient cohort from the Shanghai Cancer Center**

(a) Clinical characteristics of the patients whose tumor specimens are used in this study and are segregated by the median of gal-9<sup>+</sup>TAMs/CD45<sup>+</sup> cells by FCM. Data for each column are normalized as the Z score. (b) Percentage of gal-9<sup>+</sup>TAMs among different node stages observed by FCM (left) and IHC (right).

**Supplementary Table 1. Baseline demographics and clinical characteristics of the Zhongshan Hospital cohort**

| Characteristics               | Patients (n=141) |      |
|-------------------------------|------------------|------|
|                               | n                | %    |
| <b>Age at surgery (years)</b> |                  |      |
| ≤62                           | 72               | 51.1 |
| >62                           | 69               | 48.9 |
| <b>Sex</b>                    |                  |      |
| Male                          | 117              | 83.0 |
| Female                        | 24               | 17.0 |
| <b>Tumor size (cm)</b>        |                  |      |
| ≤3.5                          | 73               | 51.8 |
| >3.5                          | 68               | 48.2 |
| <b>pT stage</b>               |                  |      |
| T2                            | 90               | 63.8 |
| T3                            | 30               | 21.3 |
| T4                            | 21               | 14.9 |
| <b>pN stage</b>               |                  |      |
| pN0                           | 133              | 94.3 |
| pN+                           | 8                | 5.7  |
| <b>AJCC stage</b>             |                  |      |
| II                            | 87               | 61.7 |
| III                           | 46               | 32.6 |
| IV                            | 8                | 5.7  |
| <b>Grade</b>                  |                  |      |
| Low grade                     | 24               | 17.0 |
| High grade                    | 117              | 83.0 |
| <b>LVI</b>                    |                  |      |
| Absent                        | 52               | 36.9 |
| Present                       | 89               | 63.1 |
| <b>Adjuvant chemotherapy</b>  |                  |      |
| Applied                       | 69               | 48.9 |
| Not applied                   | 72               | 51.1 |
| <b>Events</b>                 |                  |      |
| Death                         | 75               | 53.2 |
| Recurrence                    | 68               | 48.2 |

Abbreviations: AJCC: American Joint Committee on cancer; LVI: Lymphovascular invasion

**Supplementary Table 2. Correlations between TAMs, Gal-9<sup>+</sup>TAMs (%), Gal-9<sup>+</sup>TAMs (%) and clinical characteristics in the Zhongshan cohort**

| Factor                        | TAMs (CD68)         |                      | P*    | Gal-9 <sup>+</sup> TAMs (%) |                 | P*    | Gal-9 <sup>+</sup> TAMs (%) |                 | P*    |
|-------------------------------|---------------------|----------------------|-------|-----------------------------|-----------------|-------|-----------------------------|-----------------|-------|
|                               | Low (<62 cells/HPF) | High (≥62 cells/HPF) |       | Low (<25%/HPF)              | High (≥25%/HPF) |       | Low (<62%/HPF)              | High (≥62%/HPF) |       |
| <b>Age at surgery (years)</b> |                     |                      | 0.266 |                             |                 | 0.661 |                             |                 | 0.362 |
| ≤62                           | 37 (26.2%)          | 35 (24.8%)           |       | 35 (24.8%)                  | 37 (26.2%)      |       | 31 (22.0%)                  | 41 (29.1%)      |       |
| >62                           | 29 (20.6%)          | 40 (28.4%)           |       | 31 (22.0%)                  | 38 (27.0%)      |       | 35 (24.8%)                  | 34 (24.1%)      |       |
| <b>Sex</b>                    |                     |                      | 0.428 |                             |                 | 0.579 |                             |                 | 0.916 |
| <b>Male</b>                   | 53 (37.6%)          | 64 (45.4%)           |       | 56 (39.7%)                  | 61 (43.3%)      |       | 55 (39.0%)                  | 62 (44.0%)      |       |
| <b>Female</b>                 | 13 (9.2%)           | 11 (7.8%)            |       | 10 (7.1%)                   | 14 (9.9%)       |       | 11 (7.8%)                   | 13 (9.2%)       |       |
| <b>Tumor size (cm)</b>        |                     |                      | 0.779 |                             |                 | 0.954 |                             |                 | 0.954 |
| ≤3.5                          | 35 (24.8%)          | 38 (27.0%)           |       | 34 (24.1%)                  | 39 (27.7%)      |       | 34 (24.1%)                  | 39 (27.7%)      |       |
| >3.5                          | 31 (22.0%)          | 37 (26.2%)           |       | 32 (22.7%)                  | 36 (25.5%)      |       | 32 (22.7%)                  | 36 (25.5%)      |       |
| <b>pT stage</b>               |                     |                      | 0.880 |                             |                 | 0.028 |                             |                 | 0.049 |
| <b>T2</b>                     | 42 (29.8%)          | 48 (34.0%)           |       | 49 (34.8%)                  | 41 (29.1%)      |       | 38 (27.0%)                  | 52 (36.9%)      |       |
| <b>T3</b>                     | 15 (10.6%)          | 15 (10.6%)           |       | 12 (8.5%)                   | 18 (12.8%)      |       | 13 (9.2%)                   | 17 (12.1%)      |       |
| <b>T4</b>                     | 9 (6.4%)            | 12 (8.5%)            |       | 5 (3.5%)                    | 16 (11.3%)      |       | 15 (10.6%)                  | 6 (4.3%)        |       |
| <b>pN stage</b>               |                     |                      | 0.018 |                             |                 | 0.858 |                             |                 | 0.582 |
| <b>pN0</b>                    | 66 (46.8%)          | 67 (47.5%)           |       | 63 (44.7%)                  | 70 (49.6%)      |       | 61 (43.3%)                  | 72 (51.1%)      |       |
| <b>pN+</b>                    | 0 (0.0%)            | 8 (5.7%)             |       | 3 (2.1%)                    | 5 (3.5%)        |       | 5 (3.5%)                    | 3 (2.1%)        |       |
| <b>AJCC stage</b>             |                     |                      | 0.022 |                             |                 | 0.092 |                             |                 | 0.375 |
| <b>II</b>                     | 42 (29.8%)          | 45 (31.9%)           |       | 47 (33.3%)                  | 40 (28.4%)      |       | 37 (26.2%)                  | 50 (35.5%)      |       |
| <b>III</b>                    | 24 (17.0%)          | 22 (15.6%)           |       | 16 (11.3%)                  | 30 (21.3%)      |       | 24 (17.0%)                  | 22 (15.6%)      |       |
| <b>IV</b>                     | 0 (0.0%)            | 8 (5.7%)             |       | 3 (2.1%)                    | 5 (3.5%)        |       | 5 (3.5%)                    | 3 (2.1%)        |       |
| <b>Grade</b>                  |                     |                      | 0.032 |                             |                 | 0.010 |                             |                 | 0.428 |

|                              |            |            |       |            |            |       |            |            |       |
|------------------------------|------------|------------|-------|------------|------------|-------|------------|------------|-------|
| <b>Low grade</b>             | 16 (11.3%) | 8 (5.7%)   |       | 17 (12.1%) | 7 (5.0%)   |       | 13 (9.2%)  | 11 (7.8%)  |       |
| <b>High grade</b>            | 50 (35.5%) | 67 (47.5%) |       | 49 (34.8%) | 68 (48.2%) |       | 53 (37.6%) | 64 (45.4%) |       |
| <b>LVI</b>                   |            |            | 0.020 |            |            | 0.352 |            |            | 0.103 |
| <b>Absent</b>                | 31 (22.0%) | 21 (14.9%) |       | 27 (19.1%) | 25 (17.7%) |       | 29 (20.6%) | 23 (16.3%) |       |
| <b>Present</b>               | 35 (24.8%) | 54 (38.3%) |       | 39 (27.7%) | 50 (35.5%) |       | 37 (26.2%) | 52 (36.9%) |       |
| <b>Adjuvant chemotherapy</b> |            |            |       |            |            |       |            |            |       |
| <b>Applied</b>               | 30 (21.3%) | 39 (27.7%) | 0.438 | 35 (24.8%) | 37 (26.2%) | 0.661 | 33 (23.4%) | 36 (25.5%) | 0.813 |
| <b>Not applied</b>           | 36 (25.5%) | 36 (25.5%) |       | 31 (22.0%) | 38 (27.0%) |       | 33 (23.4%) | 39 (27.7%) |       |

\*Fisher's exact test is used when table data do not meet the requirement of the Chi-square test.

*p*-value < 0.05 marked in bold font means statistical significance.

Abbreviations: AJCC: American Joint Committee on cancer; LVI: Lymphovascular invasion

**Supplementary Table 3. Univariate and multivariate Cox regression analyses of clinico-pathological features associated with overall survival and recurrence-free survival of MIBC patients**

|                                            | OS (n=141)                   |                  | RFS (n=114)                  |              |
|--------------------------------------------|------------------------------|------------------|------------------------------|--------------|
|                                            | HR (95% confidence interval) | P                | HR (95% confidence interval) | P            |
| <b>Univariate</b>                          |                              |                  |                              |              |
| pT stage (pT3+pT4 vs. pT2)                 | 1.497 (0.947-2.367)          | 0.084            | 1.226 (0.640-2.349)          | 0.538        |
| pN stage (pN+ vs. pN0)                     | 2.273 (0.981-5.266)          | 0.055            |                              |              |
| Grade (high vs. low)                       | 2.661 (1.274-5.557)          | <b>0.009</b>     | 4.125 (1.480-11.491)         | <b>0.007</b> |
| LVI (absent vs. present)                   | 1.633 (1.002-2.659)          | <b>0.049</b>     | 1.313 (0.741-2.326)          | 0.350        |
| ACT (applied vs. not applied)              | 0.786 (0.494-1.250)          | 0.309            | 0.554 (0.308-0.997)          | <b>0.049</b> |
| TAMs (high vs. low)                        | 1.361 (0.856-2.166)          | 0.193            | 1.346 (0.771-2.348)          | 0.296        |
| Gal-9 <sup>+</sup> TAMs (%) (high vs. low) | 2.782 (1.663-4.654)          | <b>&lt;0.001</b> | 2.171 (1.216-3.874)          | <b>0.009</b> |
| Gal-9 <sup>-</sup> TAMs (%) (high vs. low) | 0.720 (0.456-1.137)          | 0.159            | 1.087 (0.619-1.907)          | 0.771        |
| <b>Multivariate</b>                        |                              |                  |                              |              |
| pT stage (pT3+pT4 vs. pT2)                 | 1.334 (0.772-2.306)          | 0.302            | 1.616 (0.746-3.499)          | 0.223        |
| pN stage (pN+ vs. pN0)                     | 1.825 (0.738-4.515)          | 0.193            |                              |              |
| Grade (high vs. low)                       | 1.909 (0.901-4.047)          | 0.092            | 3.521 (1.251-9.913)          | <b>0.017</b> |
| LVI (absent vs. present)                   | 1.341 (0.793-2.269)          | 0.273            | 1.000 (0.542-1.847)          | 0.999        |
| ACT (applied vs. not applied)              | 0.548 (0.321-0.935)          | <b>0.027</b>     | 0.386 (0.194-0.770)          | <b>0.007</b> |
| TAMs (high vs. low)                        | 1.229 (0.758-1.992)          | 0.402            | 1.404 (0.783-2.517)          | 0.255        |
| Gal-9 <sup>+</sup> TAMs (%) (high vs. low) | 2.917 (1.581-5.383)          | <b>0.001</b>     | 2.450 (1.237-4.853)          | <b>0.010</b> |
| Gal-9 <sup>-</sup> TAMs (%) (high vs. low) | 1.057 (0.619-1.805)          | 0.839            | 1.618 (0.828-3.161)          | 0.159        |

Abbreviations: HR, Hazard ratio; LVI: Lymphovascular invasion; ACT: Adjuvant chemotherapy;

TAMs: tumor associated macrophages

p-value < 0.05 marked in bold font means statistical significance.

**Supplementary Table 4. IHC antibodies**

| Markers                | Main target              | sources           | Species           | Dilution          | Antigen Retrieval                        | Cellular localization |
|------------------------|--------------------------|-------------------|-------------------|-------------------|------------------------------------------|-----------------------|
| <b>Single-staining</b> |                          |                   |                   |                   |                                          |                       |
| CD8                    | T cells                  | Abcam, ab17147    | Mouse monoclonal  | 1:100             | Citrate buffer (pH 6.0) microwave 20 min | Membranous            |
| CD19                   | B cells                  | Abcam, ab31947    | Mouse monoclonal  | 1:400             | Citrate buffer (pH 6.0) microwave 20 min | Membranous            |
| FoxP3                  | Treg cells               | Abcam, ab22510    | Mouse monoclonal  | 1:100             | Citrate buffer (pH 6.0) microwave 20 min | Nuclear               |
| Tryptase               | Mast cells               | Abcam, ab2378     | Mouse monoclonal  | 1:10000           | Citrate buffer (pH 6.0) microwave 20 min | Cytoplasmic           |
| CD56                   | NK cells                 | Dako, clone M7304 | mouse polyclonal  | 1:50              | Citrate buffer (pH 6.0) microwave 20 min | Cytoplasmic           |
| CD66b                  | Neutrophils              | Abcam, ab197678   | Rabbit monoclonal | 1:1000            | Citrate buffer (pH 6.0) microwave 20 min | Membranous            |
| <b>Double-staining</b> |                          |                   |                   |                   |                                          |                       |
| CD11c                  | DC                       | Abcam, ad52632    | Rabbit monoclonal | 1:200             | Citrate buffer (pH 6.0) microwave 20 min | Membranous            |
| HLA-DR                 |                          | Abcam, ab20181    | Mouse monoclonal  | 1:200             |                                          |                       |
| CD4                    | Th1 cells                | Abcam, ab67001    | Mouse monoclonal  | 1:50              | Citrate buffer (pH 6.0) microwave 20 min | Membranous            |
| T-bet                  |                          | Abcam, ab150440   | Rabbit monoclonal | 1:500             |                                          |                       |
| CD4                    | Th2 cells                | Abcam, ab67001    | Mouse monoclonal  | 1:50              | Citrate buffer (pH 6.0) microwave 20 min | Membranous            |
| GATA-3                 |                          | Abcam, ab186371   | Rabbit monoclonal | 1:100             |                                          |                       |
| CD68                   | Gal-9 <sup>+</sup> macro | Dako, clone KP1   | Mouse monoclonal  | original dilution | Citrate buffer (pH 6.0) microwave 20 min | Cytoplasmic           |
| Galectin-9             | phages                   | Abcam, ab69630    | Rabbit monoclonal | 1:500             |                                          |                       |

**Supplementary Table 5. Specific markers for FCM**

| <b>Antibodies</b>                            | <b>Source</b> | <b>Fluorochrome</b> | <b>Identifier</b> |
|----------------------------------------------|---------------|---------------------|-------------------|
| <b>Fixable Viability Stain 510</b>           | BD Pharmingen | BV510               | Cat# 564406       |
| <b>anti-CD8 (RPA-T8)</b>                     | BD Pharmingen | BB515               | Cat# 564526       |
| <b>anti-CD4 (RPA-T4)</b>                     | BD Pharmingen | BV421               | Cat# 562424       |
| <b>anti-CD68 (Y1/82A)</b>                    | BD Pharmingen | AF647               | Cat# 562111       |
| <b>anti-CD25 (M-A251)</b>                    | BD Pharmingen | FITC                | Cat# 555431       |
| <b>anti-CD56 (B159)</b>                      | BD Pharmingen | BB515               | Cat# 564488       |
| <b>anti-EpCAM (EBA-1)</b>                    | BD Pharmingen | BV421               | Cat# 563180       |
| <b>anti-FOXP3 (236A/E7)</b>                  | BD Pharmingen | AF647               | Cat# 561184       |
| <b>anti-GZMB (GB11)</b>                      | BD Pharmingen | AF647               | Cat# 560212       |
| <b>anti-PRF1 (δG9)</b>                       | BD Pharmingen | PE                  | Cat# 556437       |
| <b>anti-PD-1 (EH12.1)</b>                    | BD Pharmingen | AF647               | Cat# 560838       |
| <b>anti-TIM-3 (7D3)</b>                      | BD Pharmingen | PE                  | Cat# 563422       |
| <b>anti-Galectin-9 (9M1-3)</b>               | BD Pharmingen | PE                  | Cat# 565890       |
| <b>anti-IFN<math>\gamma</math></b>           | BD Pharmingen | PE-CY7              | Cat# 557643       |
| <b>anti-IL10 (JES3-9D7)</b>                  | BD Pharmingen | BV650               | Cat# 564051       |
| <b>anti-Annexin V</b>                        | BD Pharmingen | PE                  | Cat# 561012       |
| <b>anti-CD45 (2D1)</b>                       | BD Pharmingen | APC-CY7             | Cat# 557833       |
| <b>anti-CD11b (ICRF44)</b>                   | BD Pharmingen | FITC                | Cat# 562793       |
| <b>anti-LAG3 (11C3C65)</b>                   | Biolegend     | BV785               | Cat# 369322       |
| <b>anti-TGF<math>\beta</math>1 (TW4-2F8)</b> | Biolegend     | PE-CY7              | Cat# 349610       |
| <b>anti-Ki67 (Ki-67)</b>                     | Biolegend     | AF700               | Cat# 350530       |
| <b>anti-CD3 (HIT3a)</b>                      | Biolegend     | Percp 5.5           | Cat# 300328       |
| <b>anti-CTLA4 (BNI3)</b>                     | Biolegend     | BV605               | Cat# 369610       |
| <b>anti-TIGIT (741182)</b>                   | R&D           | APC-R700            | Cat# FAB7898N     |

**Supplementary Table 6. Spearman's correlation between different cell types and gal-9<sup>+</sup>TAMs (%) or TAMs**

| Cell types         | Gal-9 <sup>+</sup> TAMs (%) |                  | TAMs           |                  |
|--------------------|-----------------------------|------------------|----------------|------------------|
|                    | Spearman's rho              | P value          | Spearman's rho | P value          |
| CD8 <sup>+</sup> T | -0.192                      | <b>0.022</b>     | 0.156          | 0.064            |
| DC                 | -0.173                      | <b>0.041</b>     | 0.037          | 0.659            |
| Treg               | 0.310                       | <b>&lt;0.001</b> | 0.309          | <b>&lt;0.001</b> |
| Mast               | 0.246                       | <b>0.003</b>     | 0.106          | 0.213            |
| B                  | 0.161                       | 0.057            | 0.254          | <b>0.002</b>     |
| NK                 | -0.007                      | 0.930            | 0.099          | 0.244            |
| N                  | 0.159                       | 0.060            | 0.361          | <b>&lt;0.001</b> |
| Th1                | -0.014                      | 0.872            | 0.092          | 0.280            |
| Th2                | 0.140                       | 0.098            | 0.165          | 0.050            |
| TAMs               | 0.315                       | <b>&lt;0.001</b> | —              | —                |

*p*-value < 0.05 marked in bold font means statistical significance.

Abbreviations: TAMs: tumor associated macrophages
